# Supplementary material for: Residency, Site Fidelity, and Regional Movement of Tiger Sharks (Galeocerdo cuvier) at a Pupping Location in the Bahamas
Source: MDPI journal article supplement (doi:10.3390/su141610017), 2022-08-12
Supplement: s1 [file s1]

Archive with 1 entries (1 files):
- sustainability-1798664-supplementary.pdf
