# Supplementary material for: Residency, Site Fidelity, and Regional Movement of Tiger Sharks (Galeocerdo cuvier) at a Pupping Location in the Bahamas
Source: MDPI journal article supplement (doi:10.3390/su141610017), 2022-08-12
Supplement: s1 [file s1 › sustainability-1798664-supplementary.pdf]

## Supplemental Material:

Supplemental Table S1: Tag identification, fork length cm (FL), total length cm (TL), and ultrasonography results for tiger sharks *Galeocerdo cuvier* sampled near Bimini, The Bahamas.

| Acoustic ID | PTT ID | Date Sampled | FL  | TL  | Reproductive Status |
|-------------|--------|--------------|-----|-----|---------------------|
| 14751       | NA     | 9-May-17     | 286 | 379 | Gravid              |
| 16732       | NA     | 10-May-17    | 272 | 353 | Gravid              |
| 17556       | 174072 | 10-May-18    | 285 | 371 | Recently postpartum |
| 17559       | 174074 | 24-Jun-18    | 302 | 340 | Gravid              |
| 12746       | 174073 | 26-Jun-18    | 285 | 334 | Non-gravid          |
| NA          | NA     | 10-Nov-18    | 318 | 374 | Gravid              |
| NA          | 174071 | 16-Jan-19    | 303 | 356 | Gravid              |
| NA          | NA     | 9-Feb-19     | 264 | 310 | Gravid              |
| 10145       | 179470 | 9-Dec-19     | 267 | 319 | Gravid              |

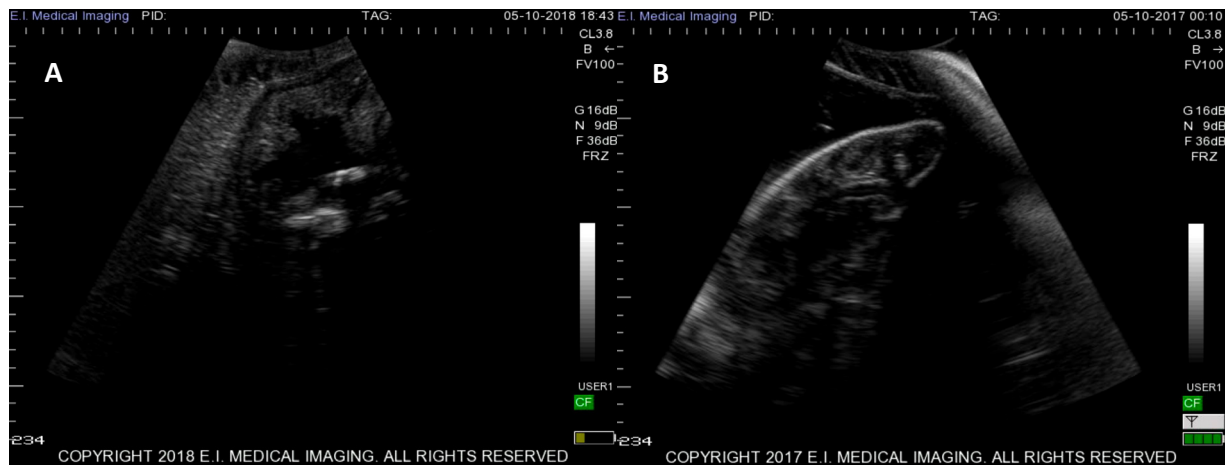

Supplemental Figure S1: Ultrasound images from tiger sharks *Galeocerdo cuvier* sampled near Bimini, The Bahamas. (A) Recently postpartum female with distention and folds in uterine wall, suggesting recent pregnancy and pupping. (B) A near-term pup with noticeable cranium and jaw structure.

Supplemental Table S2: Summary information of tiger sharks *Galeocerdo cuvier* tagged with acoustic transmitters near Bimini, The Bahamas.

| Acoustic.ID | Sex    | Fork Length (cm) | Class          | Days at Liberty | Days Detected in Bimin | Days of Bimini Longevity | Bimini Residency | Days of Overall Longevity |
|-------------|--------|------------------|----------------|-----------------|------------------------|--------------------------|------------------|---------------------------|
| 18329       | Female | 67               | Small Juvenile | 1556            | 0                      | 0                        | 0.00             | 0                         |
| 18945       | Male   | 68               | Small Juvenile | 1555            | 1                      | 3                        | 0.00             | 3                         |
| 17540       | Female | 71               | Small Juvenile | 1539            | 4                      | 33                       | 0.00             | 33                        |
| 17544       | Female | 74               | Small Juvenile | 1524            | 7                      | 14                       | 0.00             | 14                        |
| 18951       | Male   | 79               | Small Juvenile | 1555            | 0                      | 0                        | 0.00             | 0                         |
| 17543       | Female | 80               | Small Juvenile | 1525            | 1                      | 1                        | 0.00             | 1                         |
| 18946       | Female | 81               | Small Juvenile | 1580            | 2                      | 1                        | 0.00             | 106                       |
| 23164       | Female | 82               | Small Juvenile | 1910            | 1                      | 0                        | 0.00             | 0                         |
| 22262       | Female | 87               | Small Juvenile | 1828            | 0                      | 0                        | 0.00             | 0                         |
| 22261       | Male   | 91               | Small Juvenile | 1828            | 0                      | 0                        | 0.00             | 0                         |
| 22273       | Female | 91               | Small Juvenile | 1761            | 8                      | 527                      | 0.00             | 971                       |
| 14765       | Male   | 92               | Small Juvenile | 1129            | 0                      | 0                        | 0.00             | 0                         |
| 22263       | Male   | 94               | Small Juvenile | 1760            | 0                      | 0                        | 0.00             | 0                         |
| 12751       | Female | 94               | Small Juvenile | 1029            | 0                      | 0                        | 0.00             | 0                         |
| 12753       | Female | 95               | Small Juvenile | 1037            | 1                      | 0                        | 0.00             | 135                       |
| 22260       | Female | 95               | Small Juvenile | 1837            | 1                      | 0                        | 0.00             | 0                         |
| 14768       | Male   | 96               | Small Juvenile | 1129            | 1                      | 0                        | 0.00             | 0                         |
| 14764       | Male   | 100              | Small Juvenile | 1037            | 1                      | 0                        | 0.00             | 9                         |
| 14753       | Female | 102              | Small Juvenile | 1254            | 0                      | 0                        | 0.00             | 0                         |
| 20183       | Female | 102              | Small Juvenile | 1716            | 5                      | 45                       | 0.00             | 45                        |
| 22268       | Female | 102              | Small Juvenile | 1808            | 12                     | 166                      | 0.01             | 166                       |
| 16953       | Male   | 103              | Small Juvenile | 1410            | 1                      | 4                        | 0.00             | 4                         |
| 23792       | Female | 103              | Small Juvenile | 2033            | 1                      | 1                        | 0.00             | 1                         |
| 12757       | Male   | 104              | Small Juvenile | 1029            | 2                      | 193                      | 0.00             | 193                       |
| 14747       | Female | 105              | Small Juvenile | 1189            | 0                      | 0                        | 0.00             | 0                         |
| 23798       | Male   | 107              | Small Juvenile | 2026            | 1                      | 0                        | 0.00             | 0                         |
| 16734       | Male   | 107              | Small Juvenile | 1279            | 1                      | 1                        | 0.00             | 139                       |
| 16739       | Male   | 108              | Small Juvenile | 1327            | 2                      | 0                        | 0.00             | 0                         |
| 16737       | Female | 109              | Small Juvenile | 1336            | 3                      | 7                        | 0.00             | 7                         |
| 16957       | Male   | 112              | Small Juvenile | 1335            | 1                      | 70                       | 0.00             | 70                        |
| 14746       | Female | 117              | Small Juvenile | 1190            | 2                      | 1                        | 0.00             | 103                       |
| 23793       | Female | 124              | Small Juvenile | 2009            | 1                      | 0                        | 0.00             | 0                         |
| 12749       | Male   | 197              | Large Juvenile | 949             | 1                      | 0                        | 0.00             | 0                         |
| 12756       | Female | 212              | Large Juvenile | 949             | 8                      | 714                      | 0.01             | 714                       |
| 16951       | Male   | 217              | Large Juvenile | 1410            | 11                     | 532                      | 0.01             | 532                       |
| 12745       | Female | 225              | Large Juvenile | 810             | 32                     | 297                      | 0.04             | 297                       |
| 12758       | Female | 228              | Large Juvenile | 966             | 111                    | 773                      | 0.11             | 773                       |
| 14757       | Female | 230              | Large Juvenile | 1128            | 2                      | 642                      | 0.00             | 642                       |
| 18957       | Female | 233              | Large Juvenile | 1659            | 0                      | 0                        | 0.00             | 1074                      |
| 17542       | Male   | 234              | Large Juvenile | 1505            | 22                     | 289                      | 0.01             | 294                       |
| 12755       | Female | 240              | Large Juvenile | 1033            | 3                      | 2                        | 0.00             | 564                       |
| 10135       | Female | 246              | Large Juvenile | 1               | 1                      | 0                        | 1.00             | 0                         |
| 17557       | Female | 246              | Large Juvenile | 827             | 1                      | 0                        | 0.00             | 14                        |
| 16954       | Male   | 261              | Mature         | 1418            | 5                      | 733                      | 0.00             | 1059                      |
| 12750       | Female | 264              | Mature         | 965             | 0                      | 0                        | 0.00             | 37                        |
| 14766       | Female | 265              | Mature         | 1079            | 0                      | 0                        | 0.00             | 0                         |
| 10145       | Female | 267              | Mature         | 297             | 15                     | 274                      | 0.05             | 274                       |
| 10139       | Female | 276              | Mature         | 470             | 3                      | 59                       | 0.01             | 73                        |
| 22276       | Female | 278              | Mature         | 1755            | 12                     | 70                       | 0.01             | 70                        |
| 17539       | Female | 282              | Mature         | 1513            | 2                      | 15                       | 0.00             | 15                        |
| 17559       | Female | 282              | Mature         | 830             | 28                     | 643                      | 0.03             | 645                       |
| 12746       | Female | 285              | Mature         | 828             | 5                      | 684                      | 0.01             | 684                       |
| 16961       | Female | 289              | Mature         | 1400            | 17                     | 818                      | 0.01             | 818                       |
| 19683       | Female | 290              | Mature         | 1643            | 0                      | 0                        | 0.00             | 1283                      |
| 23154       | Female | 291              | Mature         | 1978            | 223                    | 1773                     | 0.11             | 1773                      |
| 16732       | Female | 294              | Mature         | 1241            | 3                      | 159                      | 0.00             | 159                       |
| 19689       | Female | 302              | Mature         | 1672            | 0                      | 0                        | 0.00             | 324                       |
| 16959       | Female | 305              | Mature         | 1399            | 3                      | 421                      | 0.00             | 421                       |
| 19692       | Female | 310              | Mature         | 1607            | 65                     | 768                      | 0.04             | 768                       |
| 17556       | Female | 310              | Mature         | 875             | 121                    | 764                      | 0.14             | 764                       |
| 16736       | Male   | 319              | Mature         | 1333            | 62                     | 1153                     | 0.05             | 1153                      |
| 22267       | Female | 322              | Mature         | 1716            | 27                     | 1137                     | 0.02             | 1137                      |
| 14751       | Female | 333              | Mature         | 1241            | 4                      | 745                      | 0.00             | 745                       |
| 16741       | Female | 333              | Mature         | 1326            | 1                      | 1065                     | 0.00             | 1065                      |

Supplemental Table S3: Recapture of tiger sharks *Galeocerdo cuvier* through the NOAA Cooperative Shark Tagging Program. Sharks originally tagged near Bimini, The Bahamas and recaptured outside of the study site.

| Tag    | Sex    | FL at Release (cm) | Release Date | Recapture Date | Days at Liberty | Horizontal Displacement (km) |
|--------|--------|--------------------|--------------|----------------|-----------------|------------------------------|
| 104804 | Female | 160                | 13-May-86    | 26-Aug-86      | 105             | 448                          |
| 256840 | Female | 183                | 17-Nov-99    | 22-Mar-03      | 1221            | 59                           |
| 256846 | Female | 143                | 27-Sep-00    | 5-Mar-02       | 524             | 539                          |
| 268837 | Female | 201                | 28-Jun-02    | 2-Sep-03       | 431             | 1107                         |
| 262996 | Male   | 201                | 21-Aug-03    | 6-Aug-05       | 716             | 3532                         |
| 288090 | Female | 144                | 30-Jan-04    | 19-Jun-04      | 141             | 1761                         |
| 292965 | Female | 222                | 4-Nov-05     | 18-Sep-07      | 683             | 3234                         |
| 310777 | Female | 134                | 26-Aug-06    | 1-Apr-09       | 949             | 1007                         |
| 312191 | Female | 150                | 11-Nov-06    | 3-Apr-10       | 1239            | 952                          |
| 310817 | Female | 185                | 13-Jun-07    | 20-Feb-11      | 1348            | 46                           |
| 316461 | Female | 120                | 28-Sep-07    | 15-Oct-08      | 383             | 1341                         |
| 323641 | Female | 195                | 16-Jun-08    | 19-Sep-08      | 95              | 39                           |
| 339298 | Male   | 202                | 31-Mar-10    | 16-Jul-13      | 1203            | 3130                         |
| 354372 | Female | 220                | 25-Jan-13    | 24-Jun-17      | 1611            | 156                          |
| 352935 | Female | 223                | 12-May-13    | 5-May-14       | 358             | 144                          |
| 359498 | Male   | 239                | 19-Feb-14    | NA             | NA              | 328                          |
| 359468 | Female | 168                | 4-Jul-14     | 18-Feb-15      | 229             | 2921                         |
| 363913 | Female | 141                | 31-Aug-14    | 16-Oct-16      | 777             | 1017                         |
| 373598 | Female | 214                | 14-Oct-15    | 12-Jan-22      | 2282            | 139                          |
| 373627 | Female | 91                 | 8-Dec-15     | 26-Aug-17      | 627             | 150                          |
| 373659 | Female | 113                | 21-Jan-16    | 15-Nov-16      | 299             | 785                          |
| 377788 | Male   | 261                | 13-Nov-16    | 11-Jun-21      | 1671            | 200                          |
| 382523 | Female | 164                | 27-Jul-17    | 19-Oct-17      | 84              | 80                           |
| 385113 | Female | 111                | 26-Feb-18    | 2-Oct-19       | 583             | 1174                         |
| 398150 | Female | 223                | 30-Oct-20    | 13-Jun-21      | 226             | 157                          |

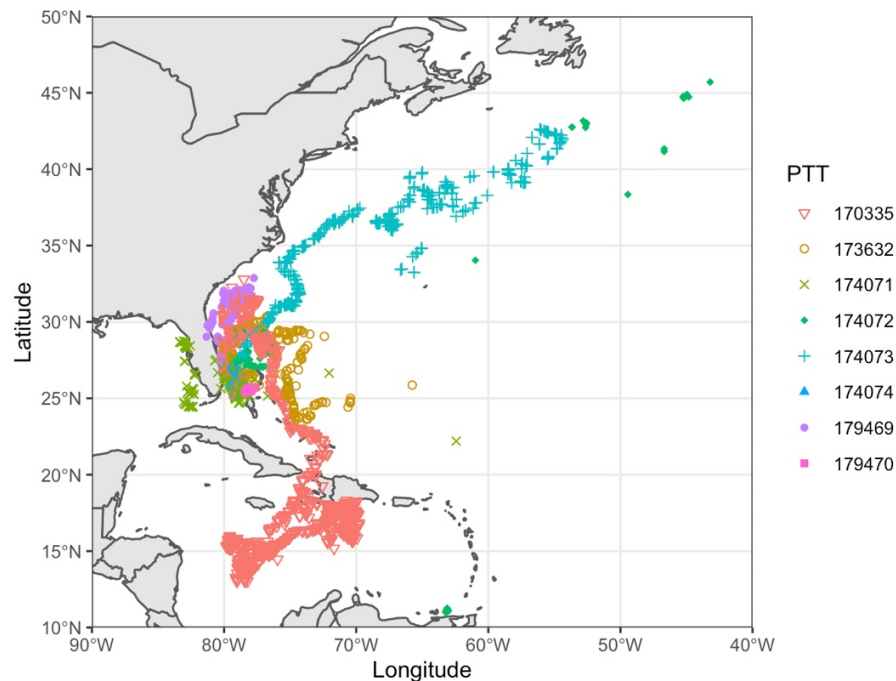

Supplemental Figure S2: Raw data locations from Smart Position and Temperature (SPOT) satellite tags deployed on tiger sharks *Galeocerdo cuvier* near Bimini, The Bahamas.
